# Supplementary material
Source: publisher figshare collection journal article supplement (https://sage.figshare.com/ndownloader/files/23063366)
Supplement: Supplementary file 1 [file 23063366]

**Table S1: ICD-9 codes used for identification of baseline characteristics**

| Condition | ICD-9 Codes used |
| --- | --- |
| Hypertension | 401.x, 402.x, 403.x, 404.x, 405.x, 437.2 |
| Diabetes mellitus | 250.x, 357.2, 362.0, 366.41 |
| Atrial fibrillation | 427.3, 427.30, 427.31, 427.32 |
| Congestive heart failure | 398.91 402.01, 402.11, 402.91, 404.01, 404.11, 404.03, 404.13, 404.91, 404.93, 425.x, 428.x |
| COPD | 490.x, 491.x, 492.x, 494.x, 496.x |
| Coronary artery disease | 412.x, 413.x, 414.x |
| Peripheral vascular disease | 440.x, 441.x, 442.x, 443.89, 443.9x |
| Liver disease | 456.0, 456.1, 456.2x, 567.23, 571.2, 571.4x, 571.5x, 571.6x, 571.8x, 571.9x, 572.2, 572.3, 572.4, 572.8, 789.5x |
| Kidney disease | 403.x, 405.01, 405.11, 405.91, 581.x, 582.x, 583.x, 585.x, 586.x, 587.x, 588.89, 588.9 |

Table S2a. Mono- or dual therapy for all arthroplasty stratified by age group for the in-hospital sample

|  | **Age Group (years)** | | | |
| --- | --- | --- | --- | --- |
| **65 - 69** | **70 – 74** | **75 - 79** | **80 +** |
| **N (%)** | **N (%)** | **N (%)** | **N (%)** |
| **Anticoagulant ONLY (n = 7268)** | 2497 (71.1) | 1954 (68.9) | 1508 (69.4) | 1309 (66.1) |
| **Aspirin ONLY (n = 1211)** | 410 (11.7) | 329 (11.6) | 237 (10.9) | 235 (11.9) |
| **Aspirin + Anticoagulant (n = 1417)** | 394 (11.2) | 381 (13.4) | 319 (14.7) | 323 (16.3) |
| **None of the above (n = 607)** | 212 (6.0) | 173 (6.1) | 110 (5.1) | 112 (5.7) |
| **Total (N = 10503)** | 3513 (100.0) | 2837 (100.0) | 2174 (100.0) | 1979 (100.0) |

Table S2b. Mono- or dual therapy for all arthroplasty stratified by age group for the discharge sample

|  | **Age Group (years)** | | | |
| --- | --- | --- | --- | --- |
| **65 - 69** | **70 – 74** | **75 - 79** | **80 +** |
| **N (%)** | **N (%)** | **N (%)** | **N (%)** |
| **Anticoagulant ONLY (n=3685)** | 1260 (65.0) | 998 (64.3) | 784 (65.8) | 643 (61.9) |
| **Aspirin ONLY (n=1052)** | 378 (19.5) | 289 (18.6) | 193 (16.2) | 192 (18.5) |
| **Aspirin + Anticoagulant (n=911)** | 278 (14.3) | 242 (15.6) | 199 (16.7) | 192 (18.5) |
| **None of the above (n=74)** | 23 (1.2) | 23 (1.5) | 16 (1.4) | 12 (1.2) |
| **Total (n = 5722)** | 1939 (100.0) | 1552 (100.0) | 1192 (100.0) | 1039 (100.0) |

Table S3a. In-hospital prophylaxis for all arthroplasty stratified by hospital bed size and inpatient surgical volume

|  | **Hospital Bed Size** | | | **Total Inpatient Surgical Operations** | | | |
| --- | --- | --- | --- | --- | --- | --- | --- |
| **6-99** | **100-199** | **≥ 200** | **< 1000** | **1000-1499** | **1500-2499** | **≥ 2500** |
| **N (%)** | **N (%)** | **N (%)** | **N (%)** | **N (%)** | **N (%)** | **N (%)** |
| **Fondaparinux** | 56 (2.8) | 86 (1.9) | 72 (1.8) | 49 (4.6) | 75 (3.9) | 4 (0.1) | 86 (2.2) |
| **DOAC** | 265 (13.4) | 1235 (27.1) | 381 (9.6) | 342 (31.7) | 639 (32.8) | 445 (12.7) | 455 (11.4) |
| **LMWH** | 424 (21.5) | 1793 (39.3) | 1149 (28.9) | 464 (43.0) | 544 (28.0) | 1010 (28.9) | 1348 (33.9) |
| **Warfarin** | 561 (28.5) | 1271 (27.9) | 1392 (35.1) | 150 (13.9) | 628 (32.3) | 1205 (34.5) | 1241 (31.2) |
| **Aspirin** | 546 (27.7) | 69 (1.5) | 596 (15.0) | 11 (1.0) | 8 (0.4) | 689 (19.7) | 503 (12.6) |
| **None** | 120 (6.1) | 105 (2.3) | 382 (9.6) | 62 (5.8) | 51 (2.6) | 145 (4.1) | 349 (8.8) |
| **Total** | 1972 (100.0) | 4559 (100.0) | 3972 (100.0) | 1078 (100.0) | 1945 (100.0) | 3498 (100.0) | 3982 (100.0) |

Total number of hospitals = 62.

For hospital bed size, number of hospitals for each category: 6-99, n=17; 100-199, n=27; ≥ 200, n=18.

For inpatient surgical operations, number of hospitals for each category: < 1000, n=16; 1000-1499, n=17; 1500-2400, n=14; ≥ 2500, n=15.

Table S3b. Discharge prophylaxis for all arthroplasty stratified by hospital bed size and inpatient surgical volume

|  | **Hospital Bed Size** | | | **Total Inpatient Surgical Operations** | | | |
| --- | --- | --- | --- | --- | --- | --- | --- |
| **6-99** | **100-199** | **≥ 200** | **< 1000** | **1000-1499** | **1500-2499** | **≥ 2500** |
| **N (%)** | **N (%)** | **N (%)** | **N (%)** | **N (%)** | **N (%)** | **N (%)** |
| **Fondaparinux** | 38 (4.7) | 19 (0.8) | 35 (1.4) | 8 (1.2) | 34 (3.6) | 13 (0.7) | 37 (1.7) |
| **DOAC** | 187 (23.2) | 581 (23.7) | 308 (12.6) | 237 (35.0) | 251 (26.3) | 328 (17.4) | 260 (11.8) |
| **LMWH** | 47 (5.8) | 566 (23.1) | 434 (17.7) | 122 (18.0) | 91 (9.5) | 355 (18.9) | 483 (21.9) |
| **Warfarin** | 360 (44.7) | 951 (38.9) | 1066 (43.6) | 248 (36.6) | 488 (51.1) | 719 (38.2) | 922 (41.8) |
| **Aspirin** | 162 (20.1) | 304 (12.4) | 568 (23.2) | 51 (7.5) | 75 (7.9) | 452 (24.0) | 474 (21.5) |
| **None** | 12 (1.5) | 27 (1.1) | 35 (1.4) | 11 (1.6) | 16 (1.7) | 16 (0.9) | 31 (1.4) |
| **Total** | 808 (100.0) | 2457 (100.0) | 2457 (100.0) | 677 (100.0) | 955 (100.0) | 1883 (100.0) | 2207 (100.0) |

Total number of hospitals = 59.

For hospital bed size, number of hospitals for each category: 6-99, n=15; 100-199, n=25; ≥ 200, n=19.
